# Supplementary material for: Luteolin-3′-O-Phosphate Inhibits Lipopolysaccharide-Induced Inflammatory Responses by Regulating NF-κB/MAPK Cascade Signaling in RAW 264.7 Cells
Source: MDPI journal article supplement (doi:10.3390/molecules26237393), 2021-12-06

Table S1: <sup>1</sup>H (DMSO-D6, 500 MHz NMR) and <sup>13</sup>C (DMSO-D6, 125 MHz NMR) NMR chemical shifts of Luteolin 3'-O-phosphate (LTP)

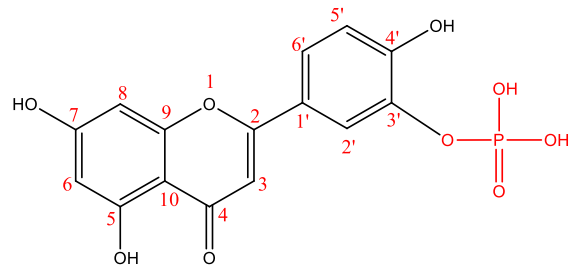

**Luteolin-3'-O-Phosphate**  
Exact Masas : 366.01

| No.   | Luteolin |                |                 | Luteolin-3'-O-phosphate |                |                 |
|-------|----------|----------------|-----------------|-------------------------|----------------|-----------------|
|       |          | <sup>1</sup> H | <sup>13</sup> C |                         | <sup>1</sup> H | <sup>13</sup> C |
| 2     |          |                | 164.1           |                         |                | 163.81          |
| 3     | 6.67     | s              | 103.4           | 6.73                    | s              | 103.68          |
| 4     |          |                | 181.7           |                         |                | 182.29          |
| 5     |          |                | 161.4           |                         |                | 162.1           |
| 6     | 6.2      | d(2.0)         | 98.8            | 6.2                     | d              | 99.49           |
| 7     |          |                | 163.8           |                         |                | 164.89          |
| 8     | 6.45     | d(2.0)         | 94.8            | 6.47                    | d              | 94.5            |
| 9     |          |                | 157.2           |                         |                | 157.8           |
| 10    |          |                | 103.6           |                         |                | 104.3           |
| 1'    |          |                | 121.9           |                         |                | 121.7           |
| 2'    | 7.4      | d(2.0)         | 113.9           | 7.71                    | s              | 120.28          |
| 3'    |          |                | 145.8           |                         |                | 141.47          |
| 4'    |          |                | 149.7           |                         |                | 153.93          |
| 5'    | 6.88     | d(8.4)         | 114.9           | 6.97                    | d              | 118.67          |
| 6'    | 7.43     | dd(2.0,8.4)    | 118.6           | 7.69                    | d              | 123.83          |
| 5-OH  | 12.98    | s              |                 | 12.94                   |                |                 |
| 7-OH  | 10.72    | s              |                 | 10.9                    |                |                 |
| 3'-OH | 9.68     | brs 2H         |                 |                         |                |                 |
| 4'-OH | 9.68     | brs 2H         |                 |                         |                |                 |

Figure S1: <sup>1</sup>H NMR spectra of Luteolin 3'-O-phosphate (LTP)

PROTON 01  
LTP (500MHz NMR DMSO-D<sub>6</sub>)

(500 MHz, DMSO-D<sub>6</sub>)

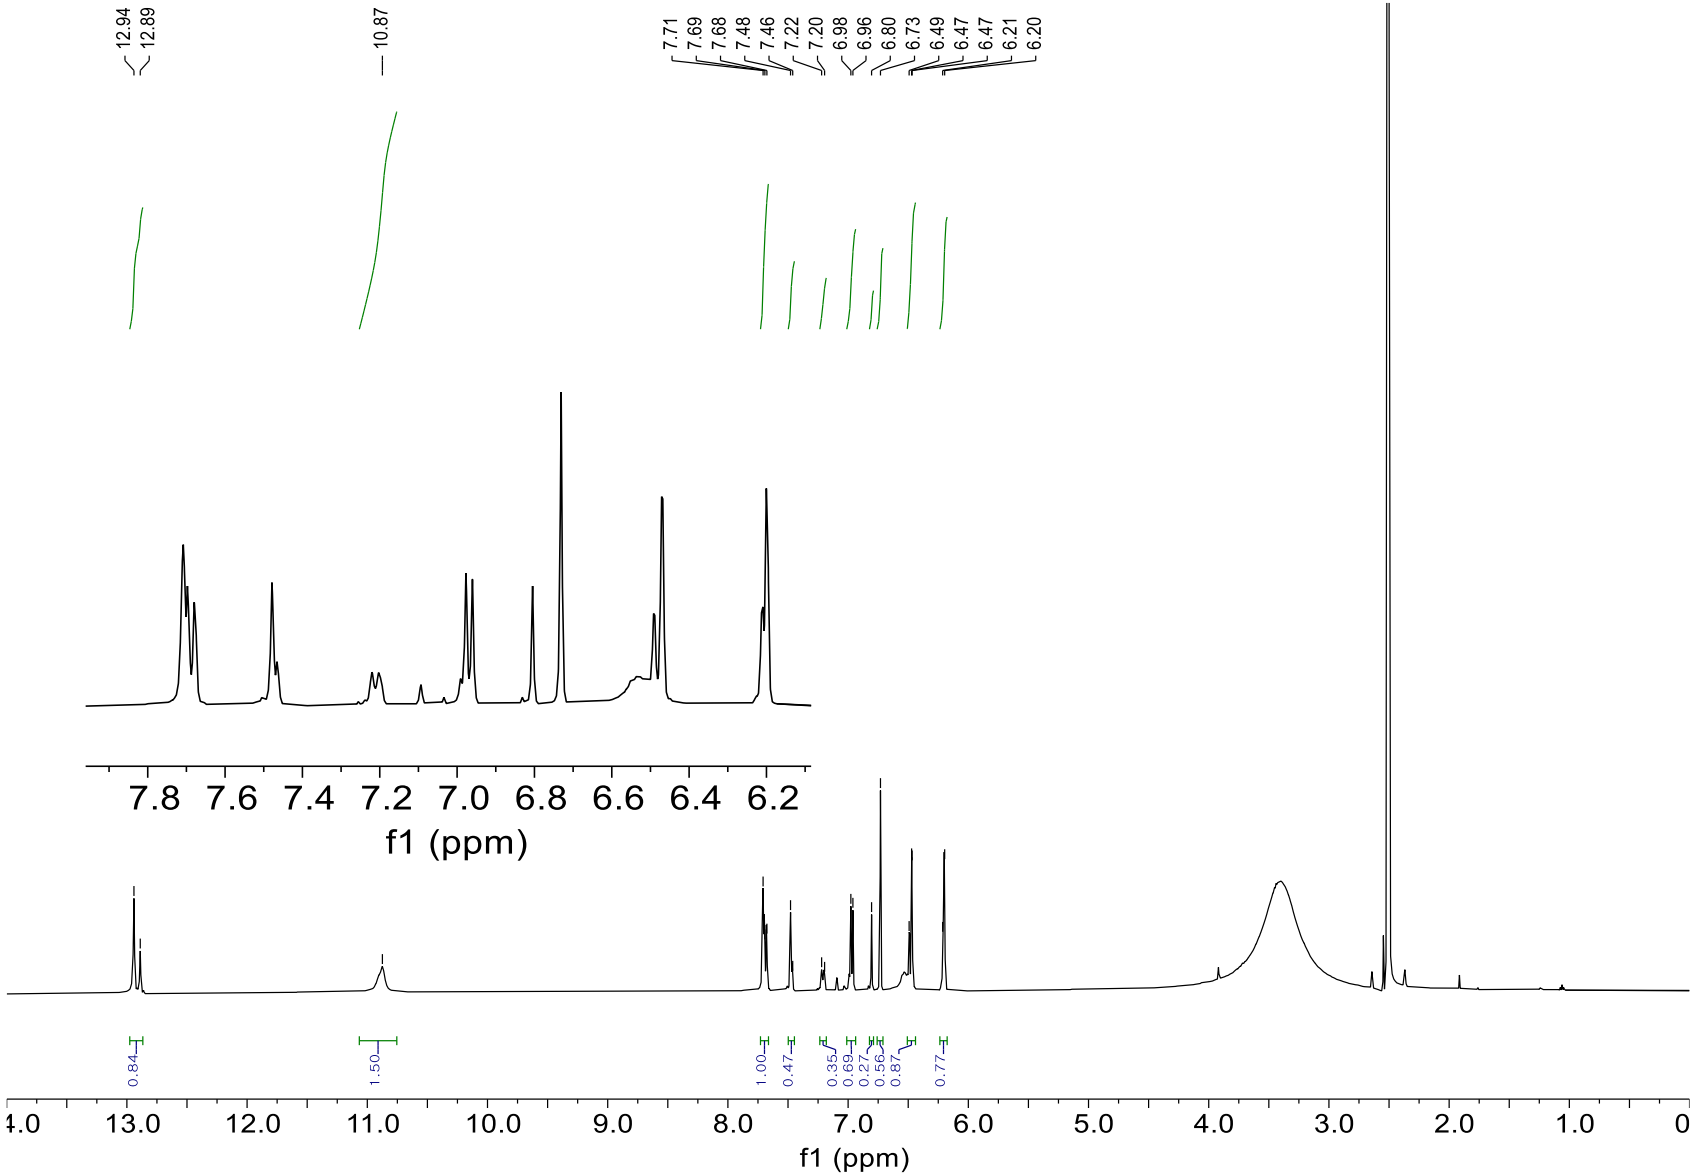

Figure S2: HSQC correlation of Luteolin 3'-O-phosphate (LTP)

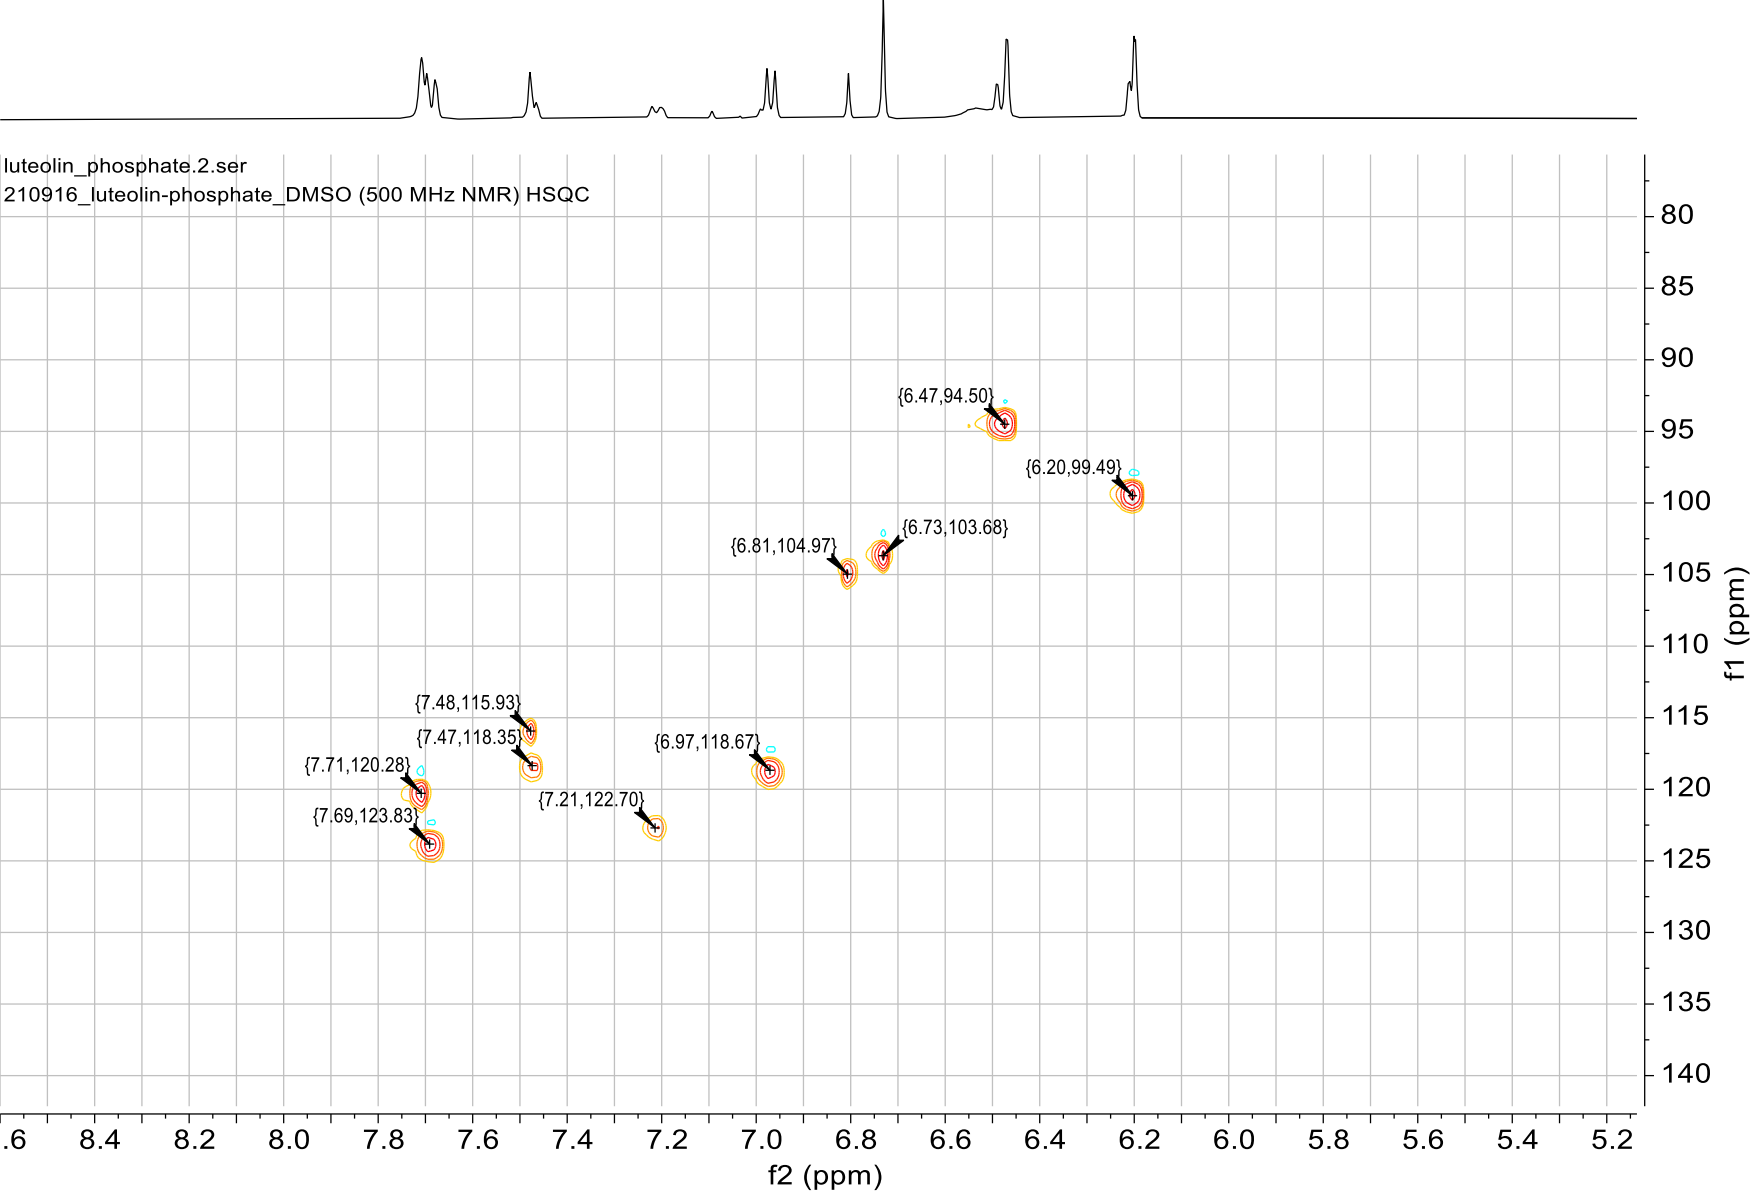

Figure S3: HMBC correlation of Luteolin 3'-O-phosphate (LTP)

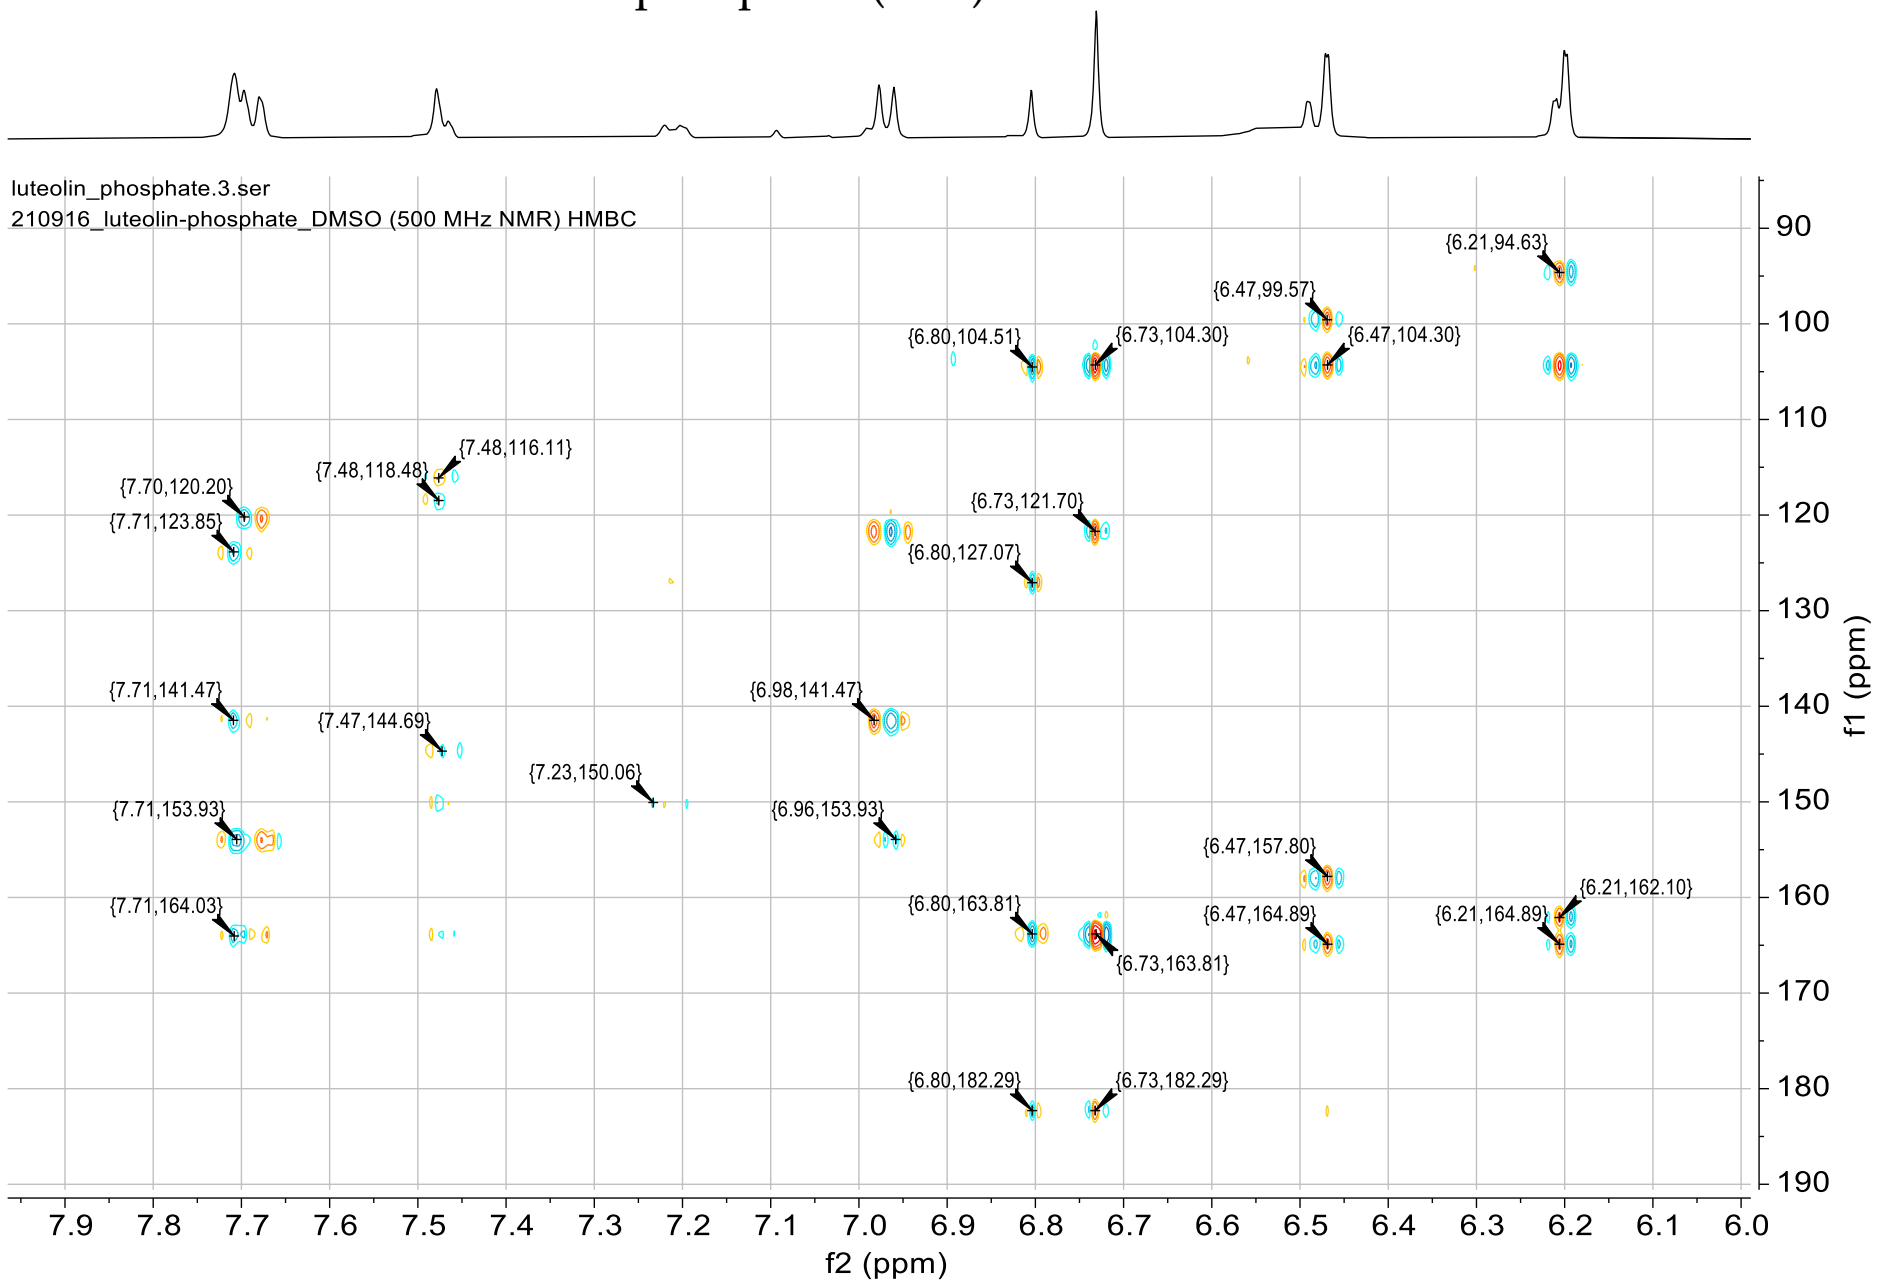

Figure S4: COSY correlation of Luteolin 3'-O-phosphate (LTP)

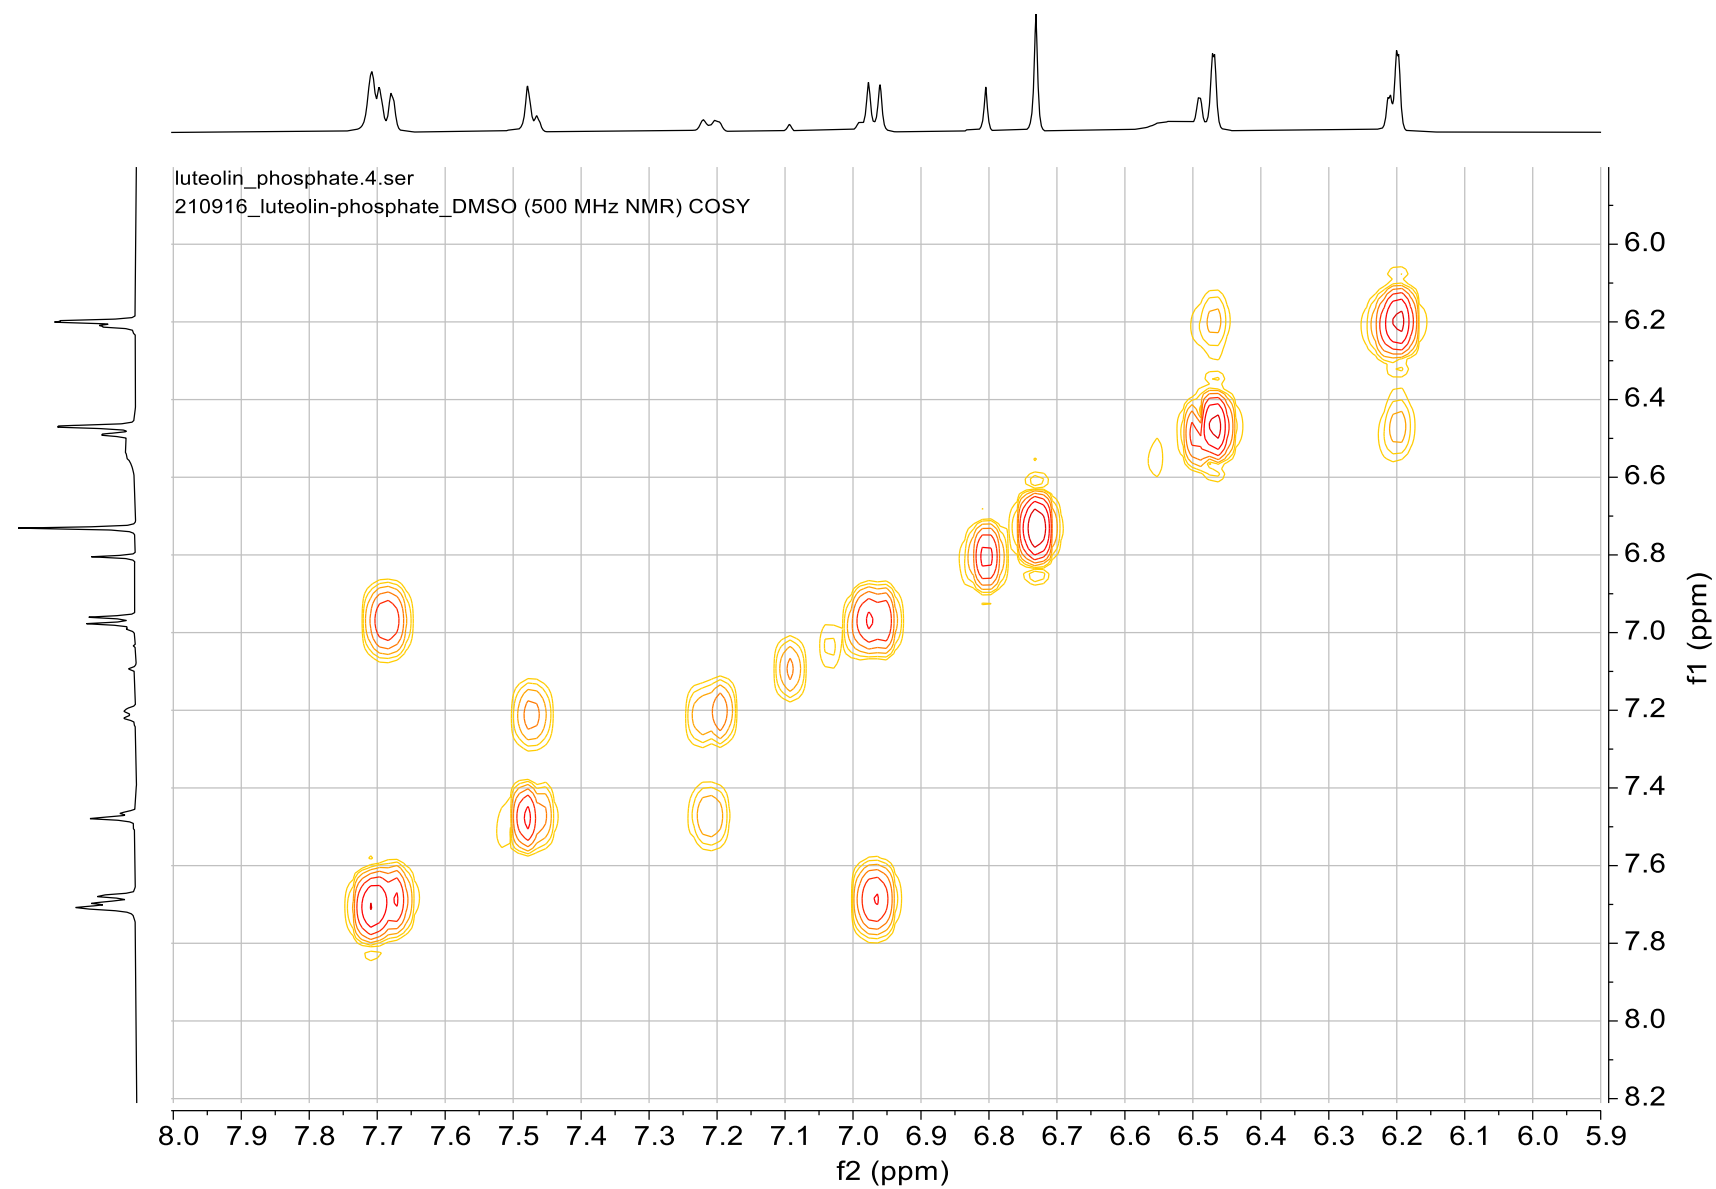

Supplement: s1 [file s1]
